# Supplementary material for: Synthesis of MoO2 hierarchical peony-like microspheres without a template and their application in lithium ion batteries
Source: Royal Society of Chemistry journal article supplement (doi:10.1039/c5ra06062a), 2015-01-01
Supplement: c5ra06062a1.pdf [file c5ra06062a1.pdf]

## Supporting Information

### Synthesis of MoO<sub>2</sub> hierarchical peony-like microspheres without template and their application in lithium ion batteries

Shasha Tang,<sup>a, b</sup> Bin Ouyang,<sup>c</sup> Linyu Yang,<sup>a, b</sup> Wenhai Ji,<sup>\* a, b</sup>

<sup>a</sup> School of Materials Science and Engineering, Central South University, Changsha410083, Hunan, China

<sup>b</sup> Education Ministry Key Laboratory of Nonferrous Metal Materials Science and Engineering, Ministry of Education, Central South University, Changsha410083, Hunan, China

<sup>c</sup> Department of Mining and Materials Engineering, McGill University, Montreal, H3A 0C5, Canada

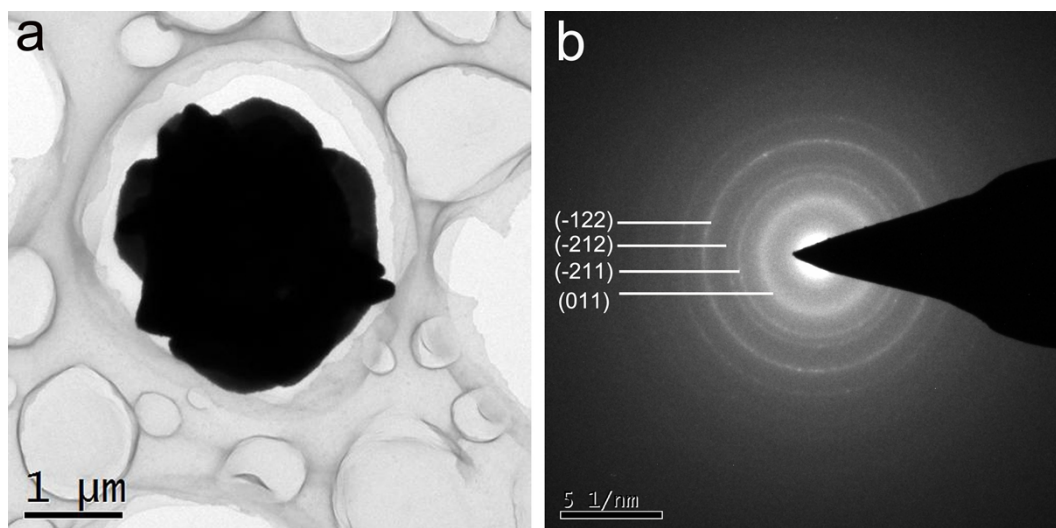

Fig. S1 TEM images of hierarchical peony-like MoO<sub>2</sub> microspheres by 12 h.

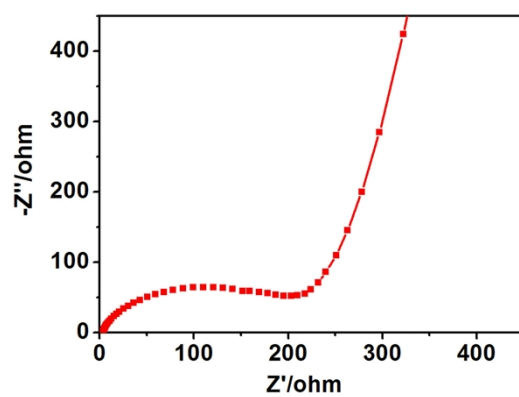

Fig. S2 Electrochemical impedance spectra of the MoO<sub>2</sub> microspheres obtained by 12 h.
